# Supplementary material
Source: Springer Nature journal article supplement (https://www.springermedizin.de/resource/supplementary/12879_2013_2978_MOESM2_ESM.pdf/9446108)

**Number of Patients**

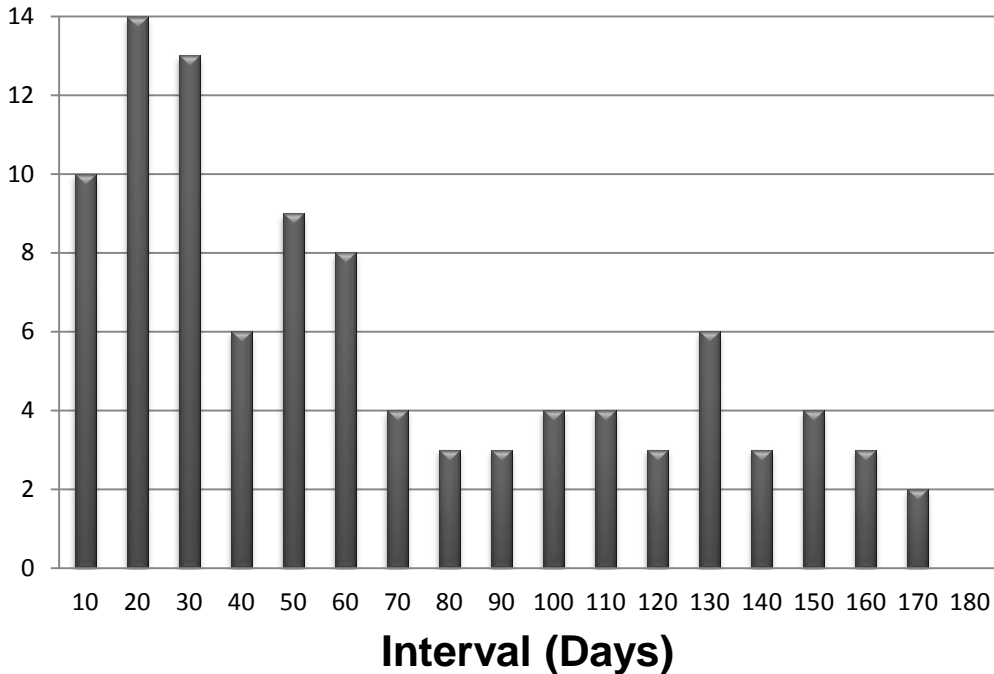

Supplement: MOESM2 [file 9446108]
